# Supplementary material for: Enhancing the usability of weather radar data for the statistical analysis of extreme precipitation events
Source: Copernicus journal article supplement (doi:10.5194/hess-2021-366), 2021-07-12
Supplement: Supplementary file [file hess-2021-366-AC1-supplement.pdf]

Comment on hess-2021-366  
Francesco Marra (Referee)

Dear Francesco Marra,

thank you very much for your valuable critics, remarks and suggestions in order to improve our manuscript. Please find our response below to the various points you raised indicating what we adapted in the manuscript.

Additionally, I would like to apologize for not being active in the open discussion during the review phase. The reason for this is that I was on parental leave, which actually started a bit earlier than was originally foreseen.

Best regards, also on behalf of my co-author,  
Andreas Hänsler

**Major comments:**

- The reference dataset is sometimes used to support the goodness of the new dataset and sometimes regarded as less accurate (e.g. in the patterns of sub-daily precip – see lines 16-18 in the abstract). Although the reasons behind this can be somehow understood, this is a problematic issue. On what bases is the dataset trusted as a reference (perhaps some durations are and some are not, some return periods are and some are not)?

I think a proper evaluation should rely on a trusted dataset. For example, rain gauges could provide a quantitatively trusted reference to gather information on the quantitative accuracy of the method on some selected locations. This might allow us to understand what aspects the radar product is or isn't able to reproduce (orographic influence at different durations, different return levels, etc). Alternatively, the trusted parts of the available dataset should be defined a priori and used for the validation, while the parts which are not trusted should be only used for comparison and discussion.

→ This is indeed a serious point but unfortunately not so easy to solve. We know that both reference datasets have serious shortcomings. Especially the spatial patterns in both datasets are impacted by the assumptions (e.g. orographic influence) of the interpolation routine. Furthermore, in the BW-Stats the magnitude of the design storms over mountainous regions can be influenced by the fact that often the same (although sometimes rather far apart) stations are pooled together. Hence, there is not the perfect reference dataset available, and especially the improvement of the spatial patterns was one of the main motivation aspects for our study.

But we agree that the shortcomings of the two reference datasets were not well described in the initial version of the manuscript. Hence we added much more information on this topic in the various parts (e.g. in the dataset description in Section 2.2. as well as in the discussion) of the manuscript.

- While I understand the need to avoid winter periods due to the known issues of weather radar monitoring with solid precipitation, it is not clear to me how it is possible to compare return levels derived from summer only (Apr-Oct as in this paper) with return levels derived from stations (the reference products) for durations up to 24 hours. The authors mention this at lines 82-84 ("Since we are mainly interested in short to medium range storm events that are mainly of convective nature, we only use data for the (summer) months from April to October, representing the main season for these kind of storm events"), but then durations up to 24 hours (e.g. see lines 244-255) are examined and discussed. This mismatch, which is not discussed by the authors, could also contribute to the overall bias found by the authors. I fear this might represent an important drawback of the presented product and of the presented comparison.

→ Actually the analysis design of the RADKLIM data is chosen in order to represent what was done when establishing the BW-Stat data. But this was unfortunately poorly described in the

original version of the manuscript and is now changed (e.g. see Section 2.2. on dataset description but also added this information in the description of the EVA - see Section 2.4). So also in BW-Stat only April to October data is used and the method was applied for 5 minutes to 24h.

With respect to convective vs. stratiform events it has to be mentioned that especially in April as well as during September/October frontal rains can lead to substantial rain amounts – hence including also the daily time step is important. Furthermore, since the main added value of the radar dataset is in the spatial picture we wanted to also analyze the shift in spatial patterns between short duration convective events and longer duration frontal rain events.

- I like the idea of sampling the surrounding pixels using probabilities, and I like the idea of basing the properties of the sampling pdf based on the typical size of convective rain cells in the region, but I am missing why the same mask is used for all durations. Since precipitation accumulations over longer durations are characterized by larger autocorrelation, my guess would be that 4 km might be good for short durations (even 1 hour could be border line according with what is said above), but too short for longer durations.

→ The reason for using the same mask for all durations is that we wanted to be able to refer differences in the spatial patterns between short and long durations to the data itself. If we would have changed the sample mask the resulting change in spatial patterns could be mainly due to this effect (or we would not know). With respect to autocorrelation we have a minimum temporal offset of 2 days required between analyzed events. Hence we assume that the effect of autocorrelation is rather small even if cells are pooled that are located not too far apart.

- Lines 107-111: this is presented in a confusing way. There is no guarantee that 100 years of data will provide perfect (or good for what matters) estimates of the 100-year return levels. Monte Carlo simulations run under realistic precipitation statistics show that empirical estimates will be subject to ~90% uncertainty (computed as the 90% confidence interval), while a simple GEV fit (method of the L-moments) will be subject to ~50% uncertainty. The advantage of using ~100 years of data instead of ~20 is clear, but should be presented in a better way.

→ That is certainly true. We changed it in the text.

- The results show an important systematic bias (as it can be inferred from fig. 4). This bias concerns most of the study area and cannot be seen as related to stochastic uncertainty, therefore the uncertainty quantification at section 3.4 cannot be accounted for explaining it. This is an important issue and I wonder what is the added value of such a quantitative information for the final user.

→ It simply shows the uncertainty related to the pooling and fitting and is in our opinion definitely something the user should be informed about, even if the absolute magnitude might not be directly in line with the one of the reference datasets.

To my view, this issue is related to a sub-optimal choice of the bias correction method (see details below), and addressing it should therefore be part of this study. The bias correction described in section 2.5 seems to me insufficient. Basically, this correction includes an additive adjustment to the data (changes the location parameter of the GPD). Since radar errors are far from being only additive, the resulting product is necessarily biased. Eventually, the results presented in the paper confirm this: the underestimation increases with return period, meaning that the other parameters are wrongly represented by the product and therefore also need to be adjusted. While the authors mention these efforts as future directions, I think that the here presented results are not sufficient to justify this publication and that these additional efforts have to be invested here.

→ This is definitely an important point and we agree with the reviewer that the applied bias correction method is far away from being perfect. And of course we know from literature that especially for high intensity events the underestimation of precipitation in the radar data is enhanced,

although a recent study comparing RADKLIM data to station data points out that the rainfall magnitude of heavy rain events between radar and station is rather similar, but the frequency is not (Kreklow et al., 2020 – see manuscript for full reference). So this actually supports our conclusion that bias correction is a very complex issue and needs to be studied in more detail.

A possibility to overcome the fact that higher intensities seem to be affected by larger biases could of course be, to apply a multiplicative correction factor. But this would mean that we add rather large rainfall amounts to the highest intensities and also disrupt the homogeneity of the sampled events. So we decided against this approach.

Furthermore, as mentioned previously, the high magnitudes of design rainfalls in the BW-Stat dataset over mountainous regions can also be questioned and could also be an artefact of the pooling. And if we compare our dataset to KOSTRA for the short durations (e.g. 15 minutes or 1h) that can be attributed to have occurred mainly during the summer season, it is not necessarily true that the bias increases with the return period (see Figure 5 – left 4 panels).

So in short and as also mentioned in the manuscript we think that the correction is important and in the present form not absolutely satisfying. However, it is definitely a complex issue which needs more research and cannot be the focus of this study. We added some of the points discussed above to the discussion section of the manuscript to make it a bit clearer. But we still think that improving the bias correction method is beyond the scope of this study.

#### **Moderate comments:**

- It seems to me that larger ensembles could produce more accurate estimates (for example they could reduce the stochastic noise still present in the data and which required the smoothing of the maps). Why is a factor of 5 chosen? Are there only statistical-independence limitations or is it also a matter of computational time?

→ Yes, it is mainly due to computational issues. But also over mountain regions the number of ensemble members is limited as more and more identical cells will be sampled. We added both points to the manuscript.

- Lines 40-41: this is an over-simplification. The short record length is indeed among the important drawbacks of weather radar archives, but other issues were highlighted in literature. The most important one is definitely estimation inaccuracy: large systematic over- and under- estimations were found due to measurement errors (e.g. Eldardiry et al., 2015; Haberlandt and Berndt, 2016, among others), but in a recent review on the topic we also highlighted the inadequacy of the adopted statistical methods (Marra et al., 2019). As these aspects are somehow addressed by the methodology in this paper, I think the introduction should better present them.

→ We changed this in the introduction

- Section 2.2: information on the extreme value methodology used in the reference products has to be provided. Something is said later in the text, but the information should be presented in an organized manner here. Also, the implications of these choices should be discussed. For example, distributions with different tail heaviness will unavoidably show different biases at different return levels. If indeed different methodologies are used, the impact of these aspects on the comparison and on the results have to be discussed.

→ There was definitely a lot of information missing with respect to the reference data. Hence we completely rewrote section 2.2

Lines 116-121: I am missing the relation between the typical size of the convective cells and sampling radius and normal distribution parameters.

→ Over BaWu the size of a convective cell during summer is between 25 and 40 km. Hence we set the maximum radius to 25 km. The other parameters are chosen in a way that the sampled cells are relatively close to the COI.

Line 132: similar to the previous comment, why is 4 km chosen here?

→ We analyzed that we do not sample additional events when we choosing the directly neighboring cells. That's why we set this minimum distance.

Line 220: It would be nice to see the results also for 1-year or 2-yr return levels. Since the adjustment is basically done on the 1-yr event, they should well isolate the quality of the product in relation to the bootstrap sampling method.

→ Not sure if we fully understand this comment, but the respective figure actually shows a 1 yr event (with the difference that the loc parameter was not clipped below/above the 5<sup>th</sup>/95<sup>th</sup> percentile).

But as the second reviewer also pointed to the fact that it would be interesting to also see the spatial patterns of a 1yr event, we added a respective figure in the appendix and briefly discussed it in the text. Actually, the spatial patterns in the 1yr design storm of BW-Stat are similar to the ones of RAD-BC.

Line 232: why is the map smoothed? It seems this is to remove some noise. However, the noise we would see in these maps is a direct representation of the stochastic uncertainties affecting the overall methodology. I think the maps would be more informative without the smoothing.

→ Actually we applied the smoothing in order to make the maps a bit cleaner in order to not be distracted by very small scale features when comparing the RAD-BC data with the highly smoothed (due to underlying interpolation) BW-Stat dataset. But since we only applied a 3x3 cell smoothing, the small features are still very present in the final figure. See below the comparison between original (left) and non-smoothed (right) for two event durations (15 & 360 mins). Based on the small differences we think that we can keep the smoothed maps. Actually a significant portion of smoothing results from the applied ensemble approach.

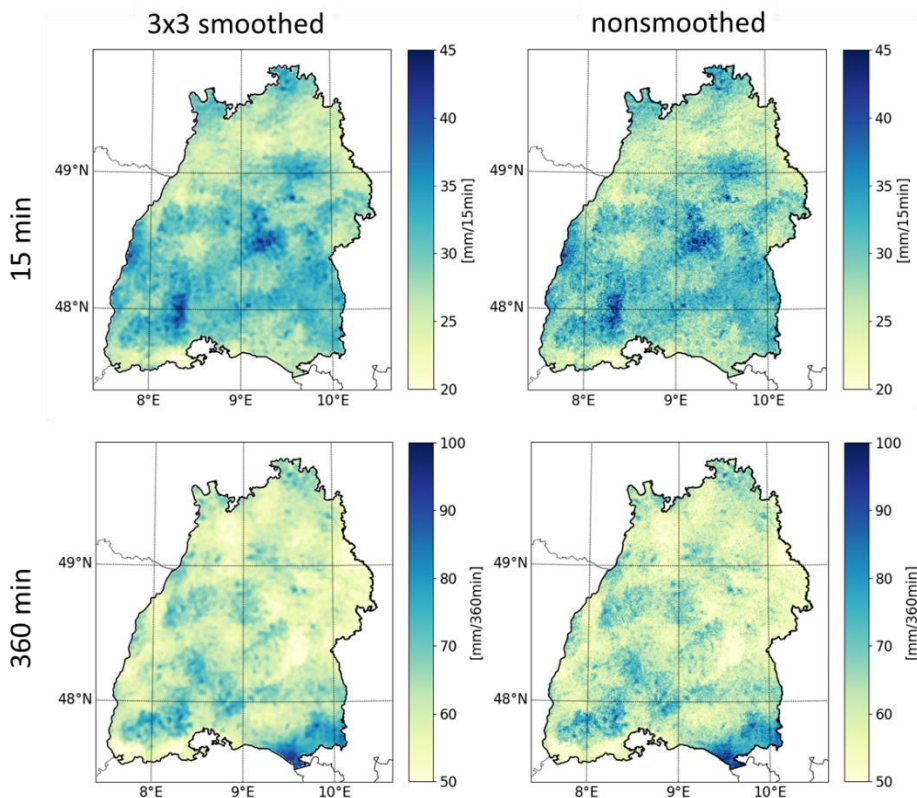

Line 310-313: I might agree on the fact that higher-order moments are more difficult to estimate and to rely on, especially from “indirect” datasets such as the ones used here as a reference. I however,

think that this problem can be somehow addressed by using a more trusted reference and by using corresponding statistical methods.

→ To our knowledge there are not many other reference datasets available for BaWu than KOSTRA and the BW-Stat data. The latter one was actually compiled due to the known shortcomings of the KOSTRA dataset. So we agree that we have to work on this issue (see also comment above to the bias correction) but we think that this is a study itself.

Although not a native speaker myself, I felt that the language level could be improved, in part due to missing use or misuse of technical terms.

→Reviewer 2 suggested quite some changes regarding wording/language which we followed.

### **Minor comments:**

Lines 16-18: this sentence is not completely clear. I could understand it only after reading the paper. Since this is the abstract, I suggest rewording it.

→Yes, indeed it is a bit misleading when you do not know the study itself. Hence, we adapted this sentence.

Line 32: some change-permitting GEV methods allow for changes also of the scale parameter (e.g. see Prosdocimi and Kjeldsen, 2021)

→Yes, that is true. But for the traditional method chosen in our study, our statement is true.

Lines 41-42: I personally disagree on this point. While this is very true for traditional methods based on extreme value analysis, there are some novel statistical methods which show promising results in this sense. They are now published since few years (the first papers are by Marani and Ignaccolo, 2015; Zorretto et al., 2016), and many came after providing evidence (with applications to rain gauge data as well as satellite data) of the fact that 20 years might be sufficient for at-site estimates of even 100-year return levels. I believe it is time to recognize this by specifying that this limit concerns the traditional methods based extreme value analyses.

→ Thanks for pointing this out. I carefully had a look at the paper from Zorretto et al (now also referenced in the revised version of the manuscript). While they definitely show that their MEV outperforms the more traditional methods when only short periods are considered it also becomes clear that the uncertainty/error of design storm estimates based on relatively short time periods are still larger than when analyzing longer records. Based on this, we believe that our original statement is not wrong, but we anyway changed the text in order to also point to these studies.

Line 112: it is not clear to me what the authors mean with "with underlying sampling probabilities"

→ Changed it to „with a specific sampling probability for each cell assigned “

Line 115: what does "not necessarily present" mean exactly? Is it a way to say "independent"?

→ It just means that we want to sample additional events or intensities which are not present in the COI – removed the word necessarily in the text. Independence of the events is assured by the 48 hour gap between two events included in the EVA.

Line 127: I suggest to include this information on the elevation range earlier in the text. Perhaps a short section describing the study area could help also in the following discussion.

→ We added the numbers in the introduction when we mention that the topography of BaWu is quite complex

Line 222: with "lower time steps", do you mean "shorter durations"?

→ Yes, exactly – we changed it accordingly
